# Supplementary material for: Geographically widespread and novel hemotropic mycoplasmas and bartonellae in Mexican free-tailed bats and sympatric North American bat species
Source: PubMed Central journal article supplement — bioRxiv. 2024 Oct 28:2024.02.08.577874. Originally published 2024 Feb 9. Preprint. [Version 2] doi: 10.1101/2024.02.08.577874 (PMC10871349; doi:10.1101/2024.02.08.577874), 2024-10-28

**Geographically widespread and novel hemotropic mycoplasmas and bartonellae in Mexican free-tailed bats and sympatric North American bat species: Supplemental Materials**

Table S1. PCR primers and amplification parameters used in this study

Table S2. GLM results for Mexican free-tailed bats from Bracken Cave, Texas

Table S3. GLM results for Mexican free-tailed bats from Selman Bat Cave, Oklahoma

Figure S1. Consensus Bayesian phylogeny of mycoplasma 23S rRNA sequences

Figure S2. Consensus Bayesian phylogeny of mycoplasma *rpoB* sequences

Table S1. PCR primers and amplification parameters used in this study.

| Primers               | Sequence                             | Organism and gene                       | Expected product (bp) | Temperature (°C) / time (seconds) |              |           |           | Cycles | Ref              |
|-----------------------|--------------------------------------|-----------------------------------------|-----------------------|-----------------------------------|--------------|-----------|-----------|--------|------------------|
|                       |                                      |                                         |                       | Initial denaturation              | Denaturation | Annealing | Extension |        |                  |
| CS 443f               | GCTATGTCTGCATTCTATCA                 | Bartonellae <i>gltA</i>                 | ~700                  | 95/120                            | 95/30        | 48/30     | 72/120    | 40     | 1                |
| CS 1210r              | GATCYTCAATCATTCTTTCCA                |                                         |                       |                                   |              |           |           |        |                  |
| Bhcs 781p             | GGGACCAGCTCATGGTGG                   |                                         | ~300                  | 95/180                            | 95/30        | 55/30     | 72/120    | 40     | 2                |
| Bhcs 1137n            | AATGCAAAAAGAACAGTAAACA               |                                         |                       |                                   |              |           |           |        |                  |
| UNI_16S_hemoFnew      | TGAATAAGTGACAGCWAACATATGTGCC         | Hemoplasma 16S rRNA                     | ~850–900              | 95/300                            | 95/50        | 60/60     | 72/60     | 55     | 3*<br>This study |
| UNI_16S_hemoR         | GACGGGCGGTGTGTACAAGACCTG             |                                         |                       |                                   |              |           |           |        |                  |
| UNI_rpoB_hemoF1       | CCTAAYTTRARYATWMGKGACGTTCACTATT<br>C | Hemoplasma <i>rpoB</i> (primer set 1)** | ~785                  | 95/300                            | 95/50        | 55/60     | 72/60     | 55     | This study       |
| UNI_rpoB_hemoR1_1     | GAAGAMARRATAATDGCATCYTCATAGTTGT<br>A |                                         |                       |                                   |              |           |           |        |                  |
| UNI_rpoB_hemoF1       | CCTAAYTTRARYATWMGKGACGTTCACTATT<br>C | Hemoplasma <i>rpoB</i> (primer set 2)** | ~1280                 | 95/300                            | 95/50        | 55/60     | 72/90     | 55     | This study       |
| UNI_rpoB_hemoR1_2     | ACAGGAGTWCCATCYTCYARRTAWGGCAT        |                                         |                       |                                   |              |           |           |        |                  |
| UNI_23S_Myc_Ur_cladeF | CCCAGACCATKGGGYAAGCCTA               | Hemoplasma 23S rRNA                     | ~1500–80              | 95/300                            | 95/50        | 58/60     | 72/90     | 55     | 3                |
| UNI_23S_Myc_Ur_cladeR | GAGACAGTCAAGAGATGGTTACAC             |                                         |                       |                                   |              |           |           |        |                  |

\*Primers were slightly modified based on available hemoplasma 16S rRNA gene data

\*\*Both sets of primers were used to amplify the hemoplasma *rpoB* gene. The *rpoB* primers were designed based on the conserved sequences found within the *rpoB* gene sequences of known hemotropic mycoplasmas and closely related *Mycoplasma* species.

1. Birtles RJ, Raoult D. Comparison of partial citrate synthase gene (*gltA*) sequences for phylogenetic analysis of *Bartonella* species. *International Journal of Systematic and Evolutionary Microbiology*. 1996;46(4):891-7.
2. Norman AF, Regnery R, Jameson P, Greene C, Krause D. Differentiation of *Bartonella*-like isolates at the species level by PCR-restriction fragment length polymorphism in the citrate synthase gene. *Journal of Clinical Microbiology*. 1995;33(7):1797-803.
3. Volokhov DV, Norris T, Rios C, Davidson MK, Messick JB, Gulland FM, Chizhikov VE. Novel hemotropic mycoplasma identified in naturally infected California sea lions (*Zalophus californianus*). *Veterinary Microbiology*. 2011;149(1-2):262-8.

Table S2. Results of GLMs with mean bias reduction for hemoplasma and *Bartonella* spp. positivity in Mexican free-tailed bat samples from Bracken Cave in Texas ( $n = 48$  and  $n = 45$ , respectively; model 4). Reference levels include bats sampled in August 2021, males, non-reproductive bats, and pre-adult bats (juveniles and subadults).

| Parameter     | hemoplasmas |      |          | <i>Bartonella</i> spp. |      |          |
|---------------|-------------|------|----------|------------------------|------|----------|
|               | OR          | z    | <i>p</i> | OR                     | z    | <i>p</i> |
| Intercept     |             | 1.79 | 0.07     |                        | 1.29 | 0.20     |
| December 2021 | 0.05        | 1.42 | 0.16     | 0.77                   | 0.12 | 0.91     |
| March 2022    | 0.26        | 0.83 | 0.41     | 3.49                   | 0.58 | 0.56     |
| Female        | 0.64        | 0.36 | 0.72     | 0.23                   | 1.32 | 0.19     |
| Reproductive  | 0.25        | 0.76 | 0.44     | 5.93                   | 0.77 | 0.44     |
| Adult         | 18.35       | 1.45 | 0.15     | 1.16                   | 0.07 | 0.95     |

Table S3. Results of GLMs with mean bias reduction for hemoplasma and *Bartonella* spp. positivity in Mexican free-tailed bat samples from Selman Bat Cave in Oklahoma ( $n = 77$  and  $n = 73$ , respectively; model 5). Reference levels include bats sampled in June 2022, males, non-reproductive bats, and pre-adult bats (juveniles and subadults).

| Parameter    | hemoplasmas |      |          | <i>Bartonella</i> spp. |      |          |
|--------------|-------------|------|----------|------------------------|------|----------|
|              | OR          | z    | <i>p</i> | OR                     | z    | <i>p</i> |
| Intercept    |             | 0.65 | 0.51     |                        | 1.01 | 0.31     |
| May 2022     | 0.08        | 2.76 | < 0.01   | 0.08                   | 3.15 | < 0.01   |
| April 2022   | 0.16        | 1.38 | 0.17     | 0.07                   | 1.51 | 0.13     |
| Female       | 4.86        | 0.81 | 0.42     | 0.77                   | 0.19 | 0.85     |
| Reproductive | 0.29        | 1.25 | 0.21     | 0.74                   | 0.33 | 0.74     |
| Adult        | 1.76        | 0.35 | 0.73     | 0.34                   | 1.05 | 0.29     |

Figure S1. Consensus Bayesian phylogeny of partial 23S rRNA mycoplasma sequences from this study (highlighted in bold and colored by geography; see Table 1 for genotype assignments) and reference sequences from bats and other mammals. Nodes are colored by posterior probability (nodes with less than 50% support are not shown). Hemoplasmas with *Candidatus* species names proposed here are indicated by asterisks and have paired 16S rRNA sequences in Figure 1.

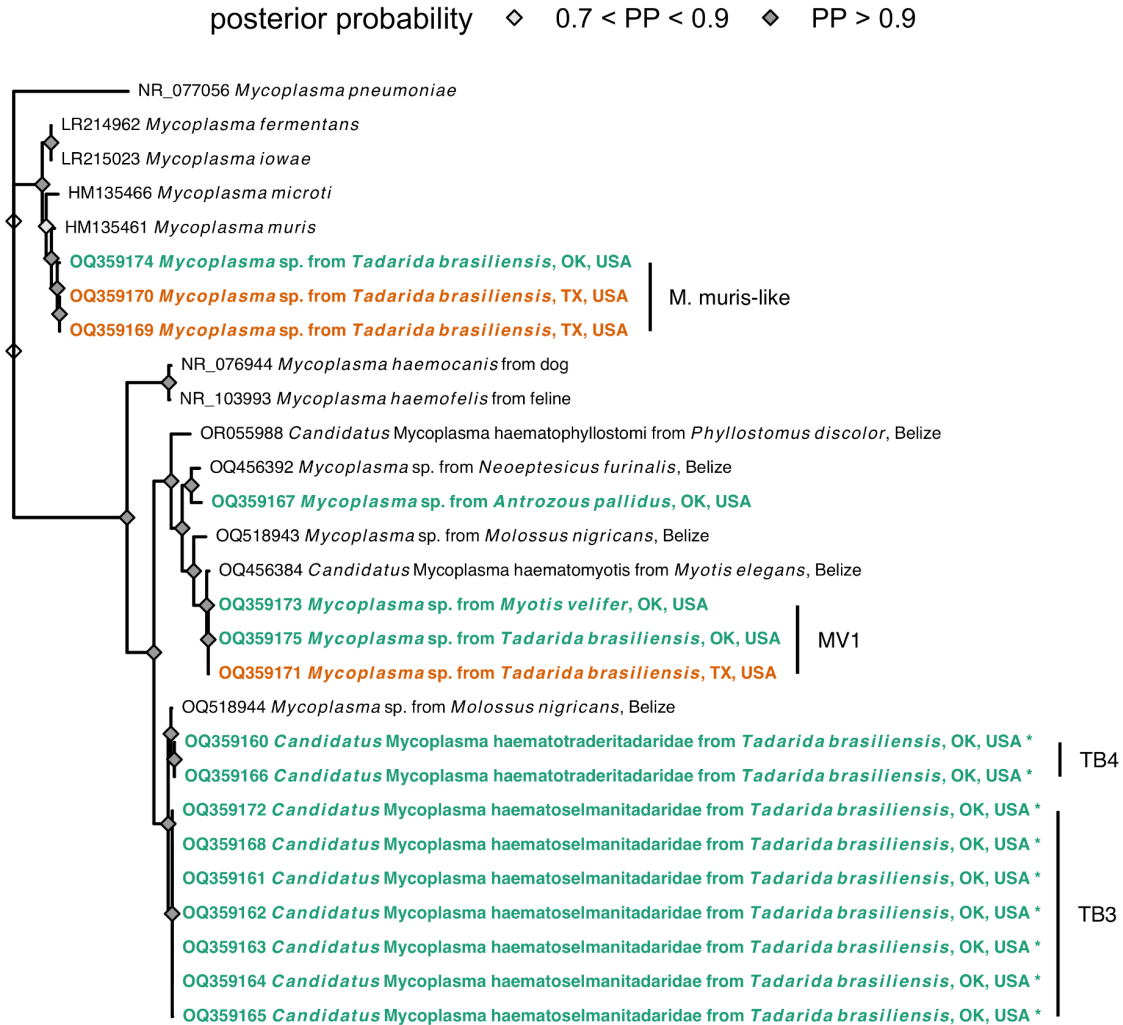

Figure S2. Consensus Bayesian phylogeny of partial *rpoB* mycoplasma sequences from this study (highlighted in bold and colored by geography; see Table 1 for genotype assignments) and reference sequences from bats and other mammals. Nodes are colored by posterior probability (nodes with less than 50% support are not shown). Hemoplasmas with *Candidatus* species names proposed here are indicated by asterisks and have paired 16S rRNA sequences in Figure 1.

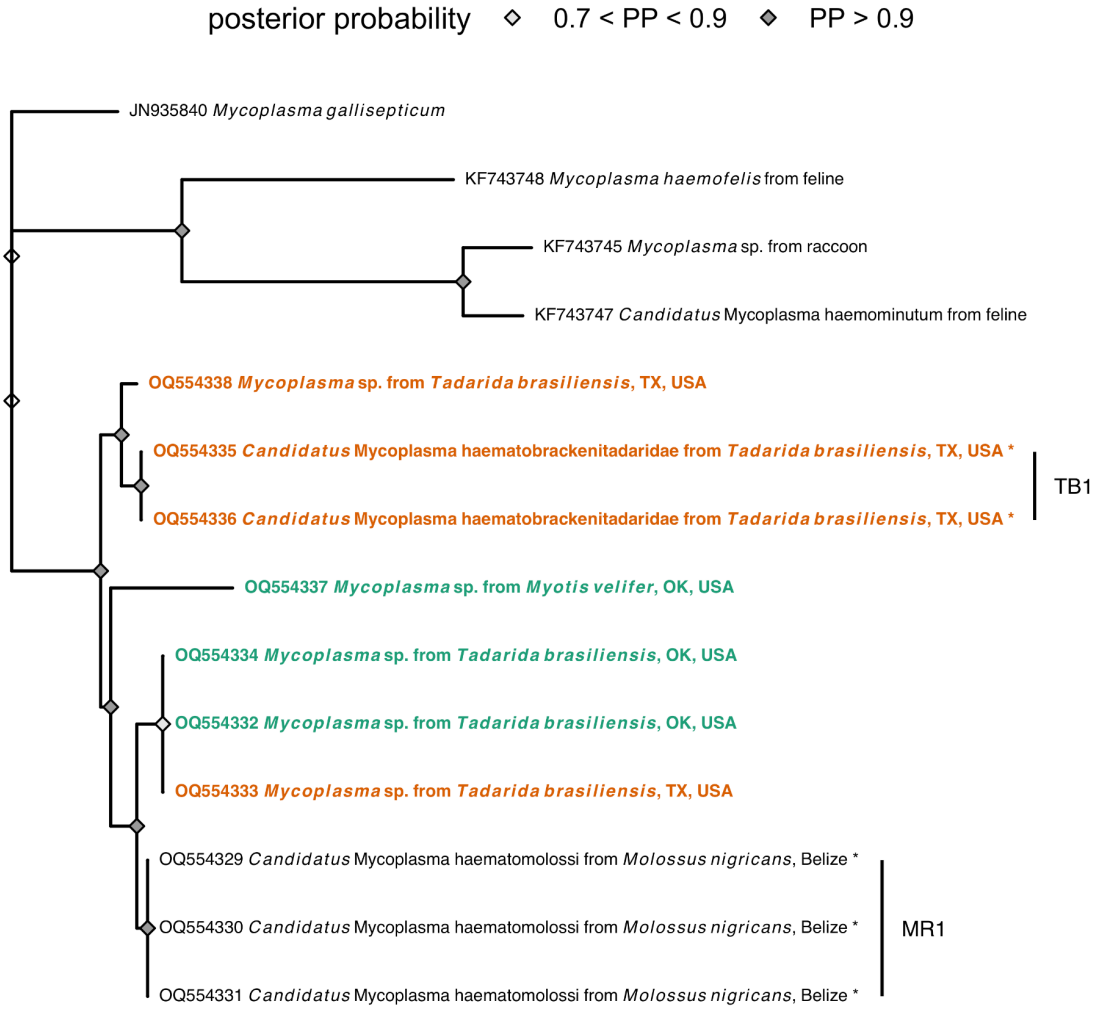

Supplement: media-1.pdf [file media-1.pdf]
